# Supplementary figures and images for: Mesh-like External Suture Splint: A Way to Improve Results and Reduce Postoperative Complications after High-definition Liposculpture
Source: PubMed Central journal article supplement — Plast Reconstr Surg Glob Open. 2024 Jul 10;12(7):e5958. doi: 10.1097/GOX.0000000000005958 (PMC11236404; doi:10.1097/gox.0000000000005958), 2024-07-10

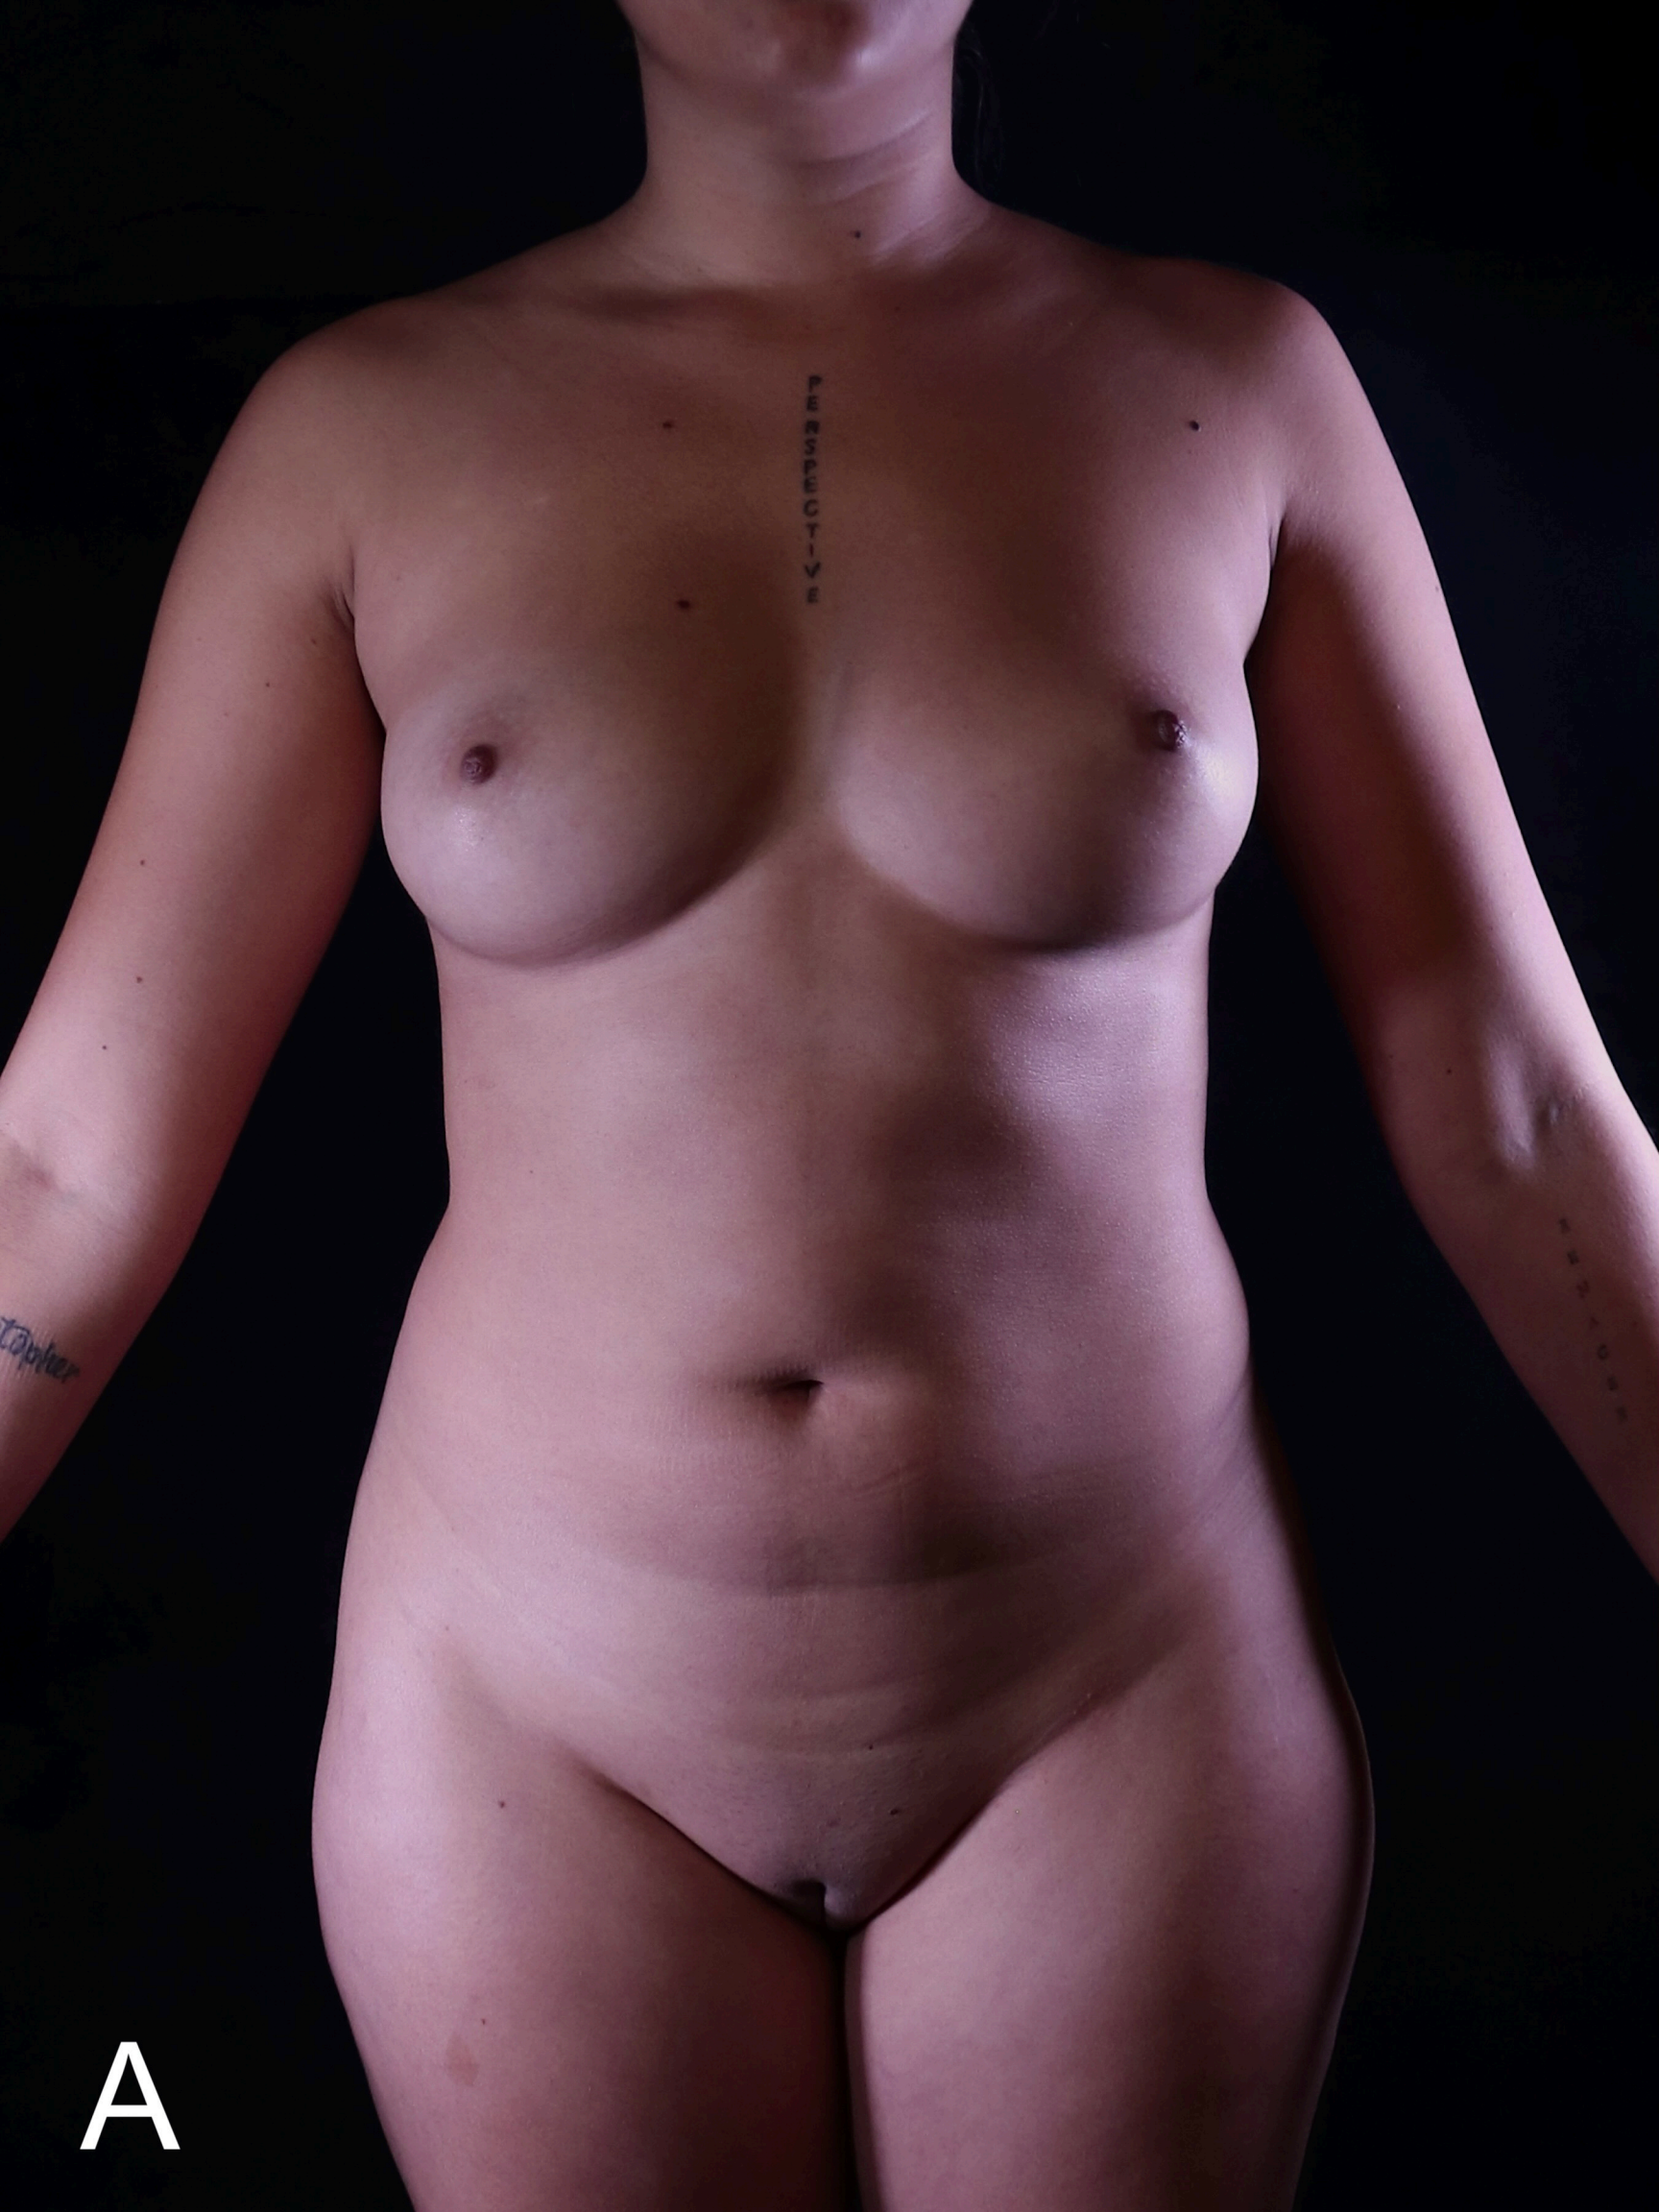

A

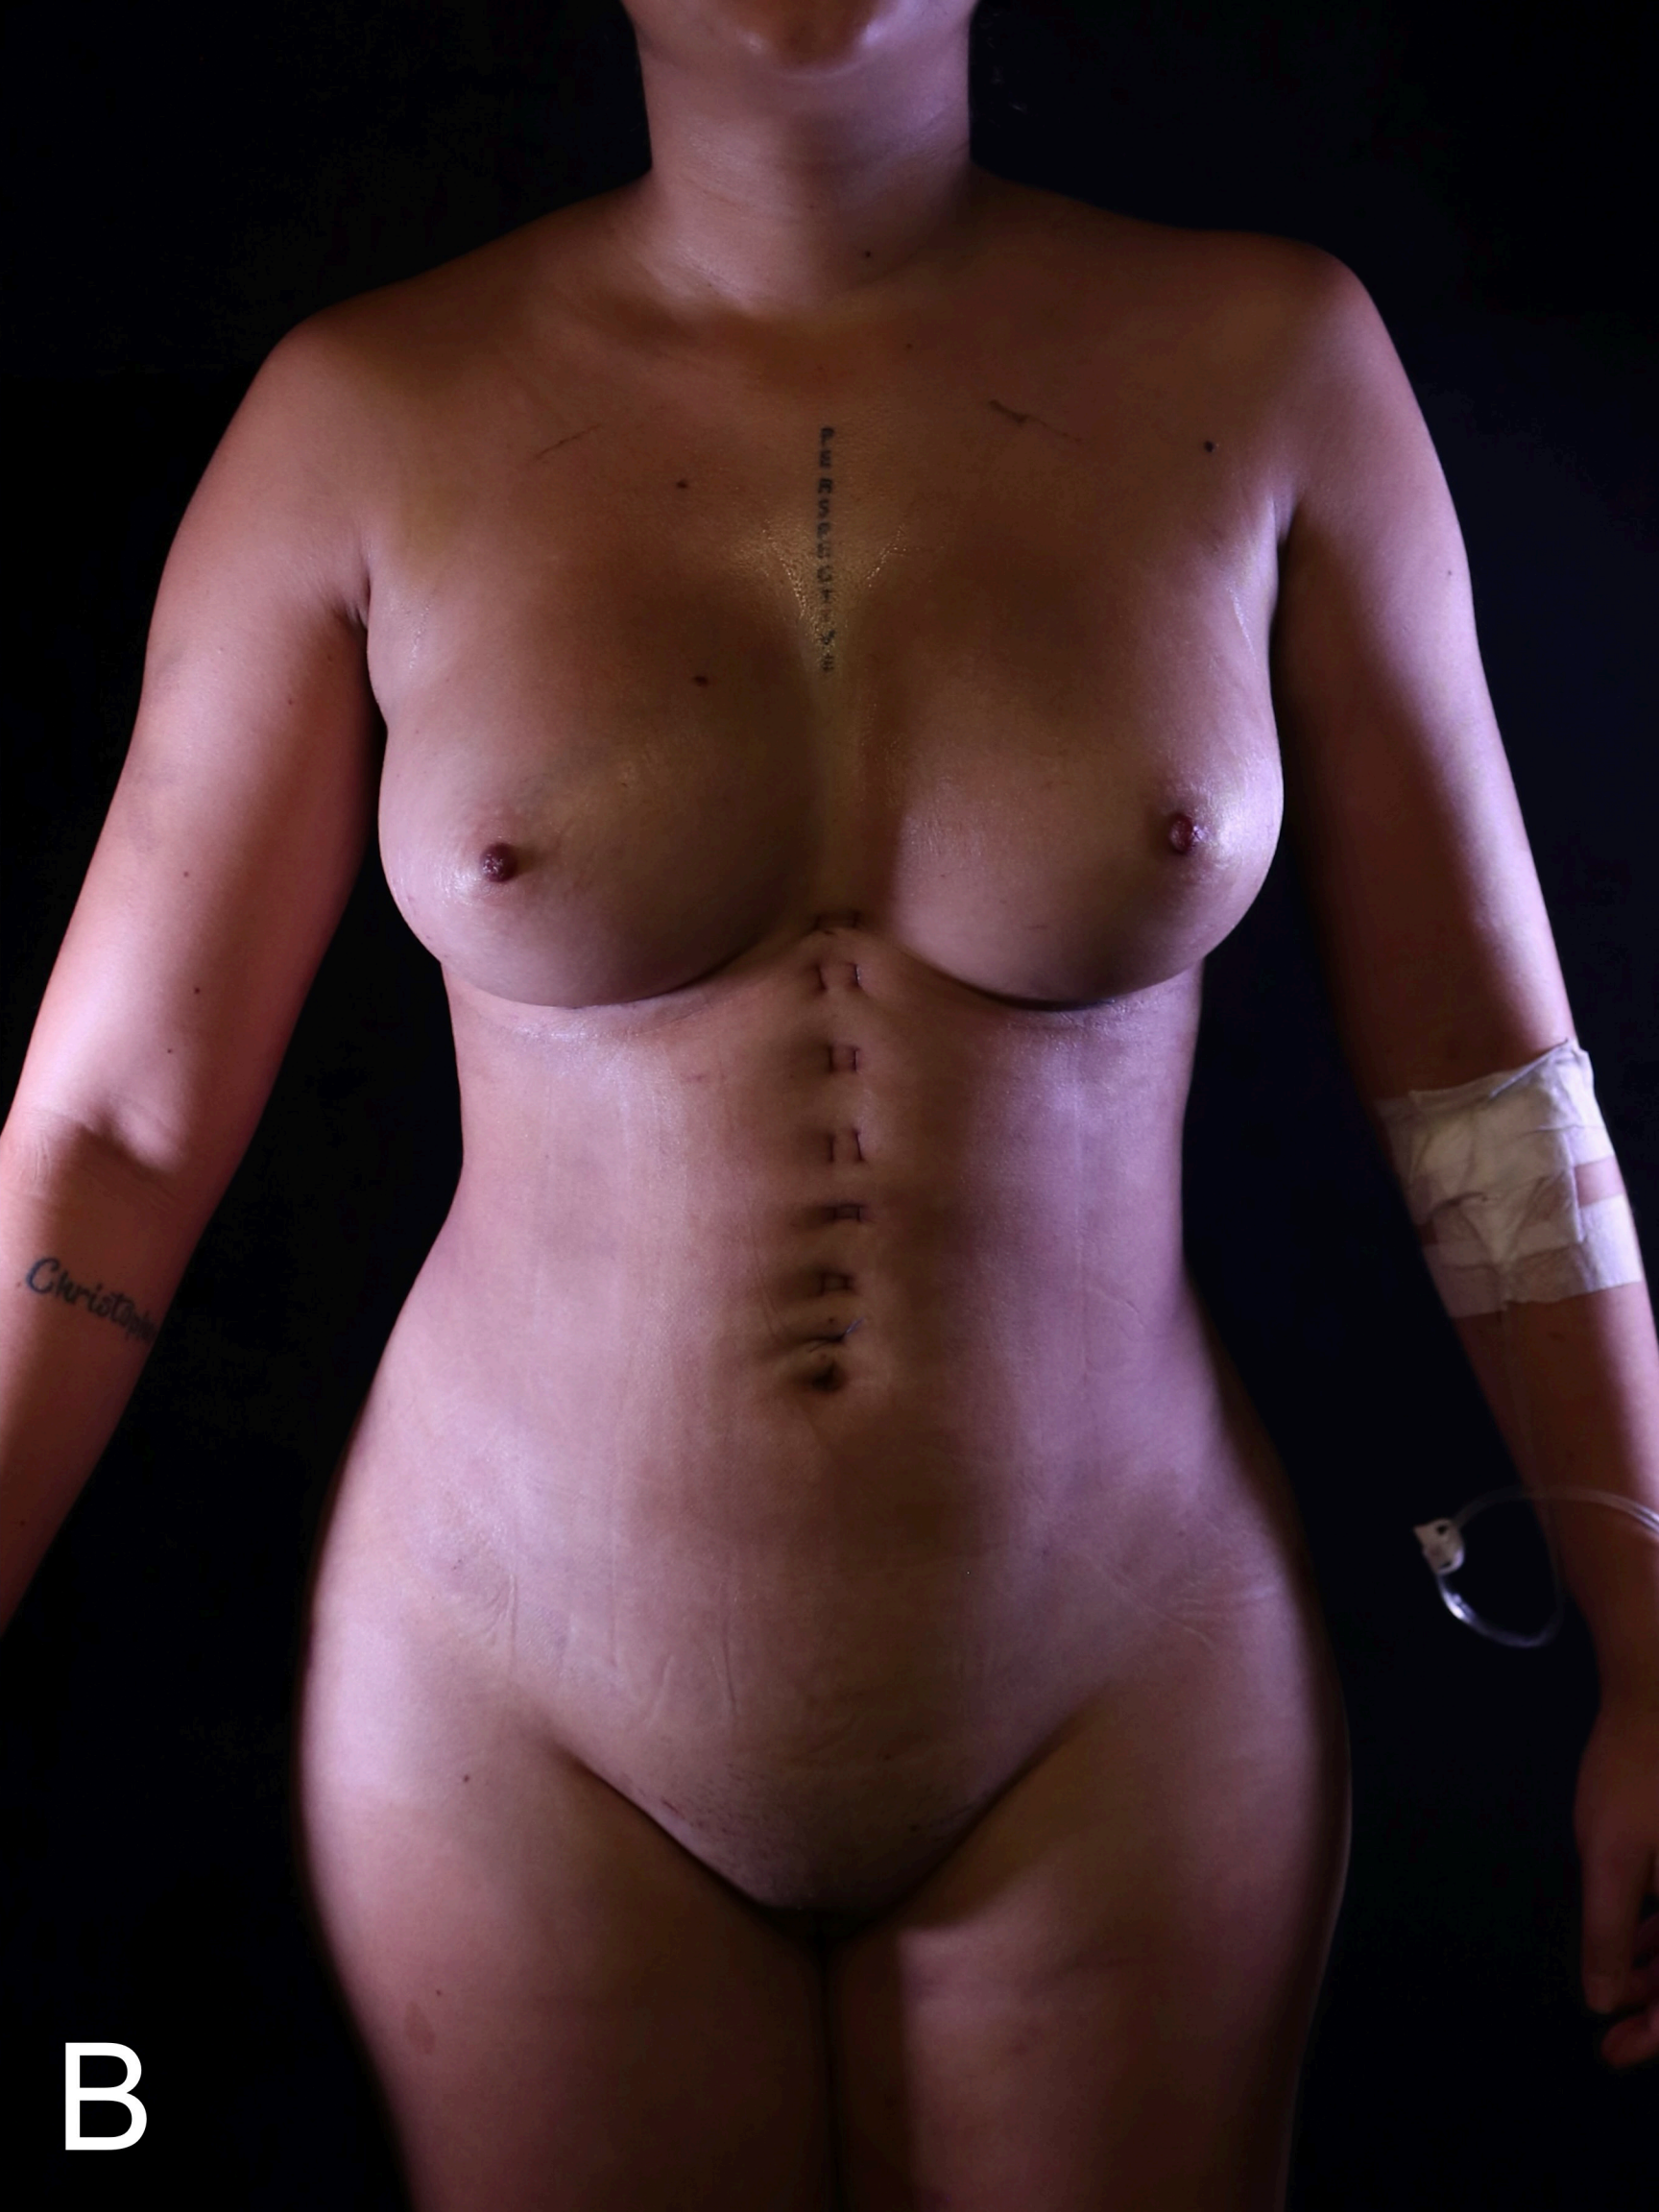

B

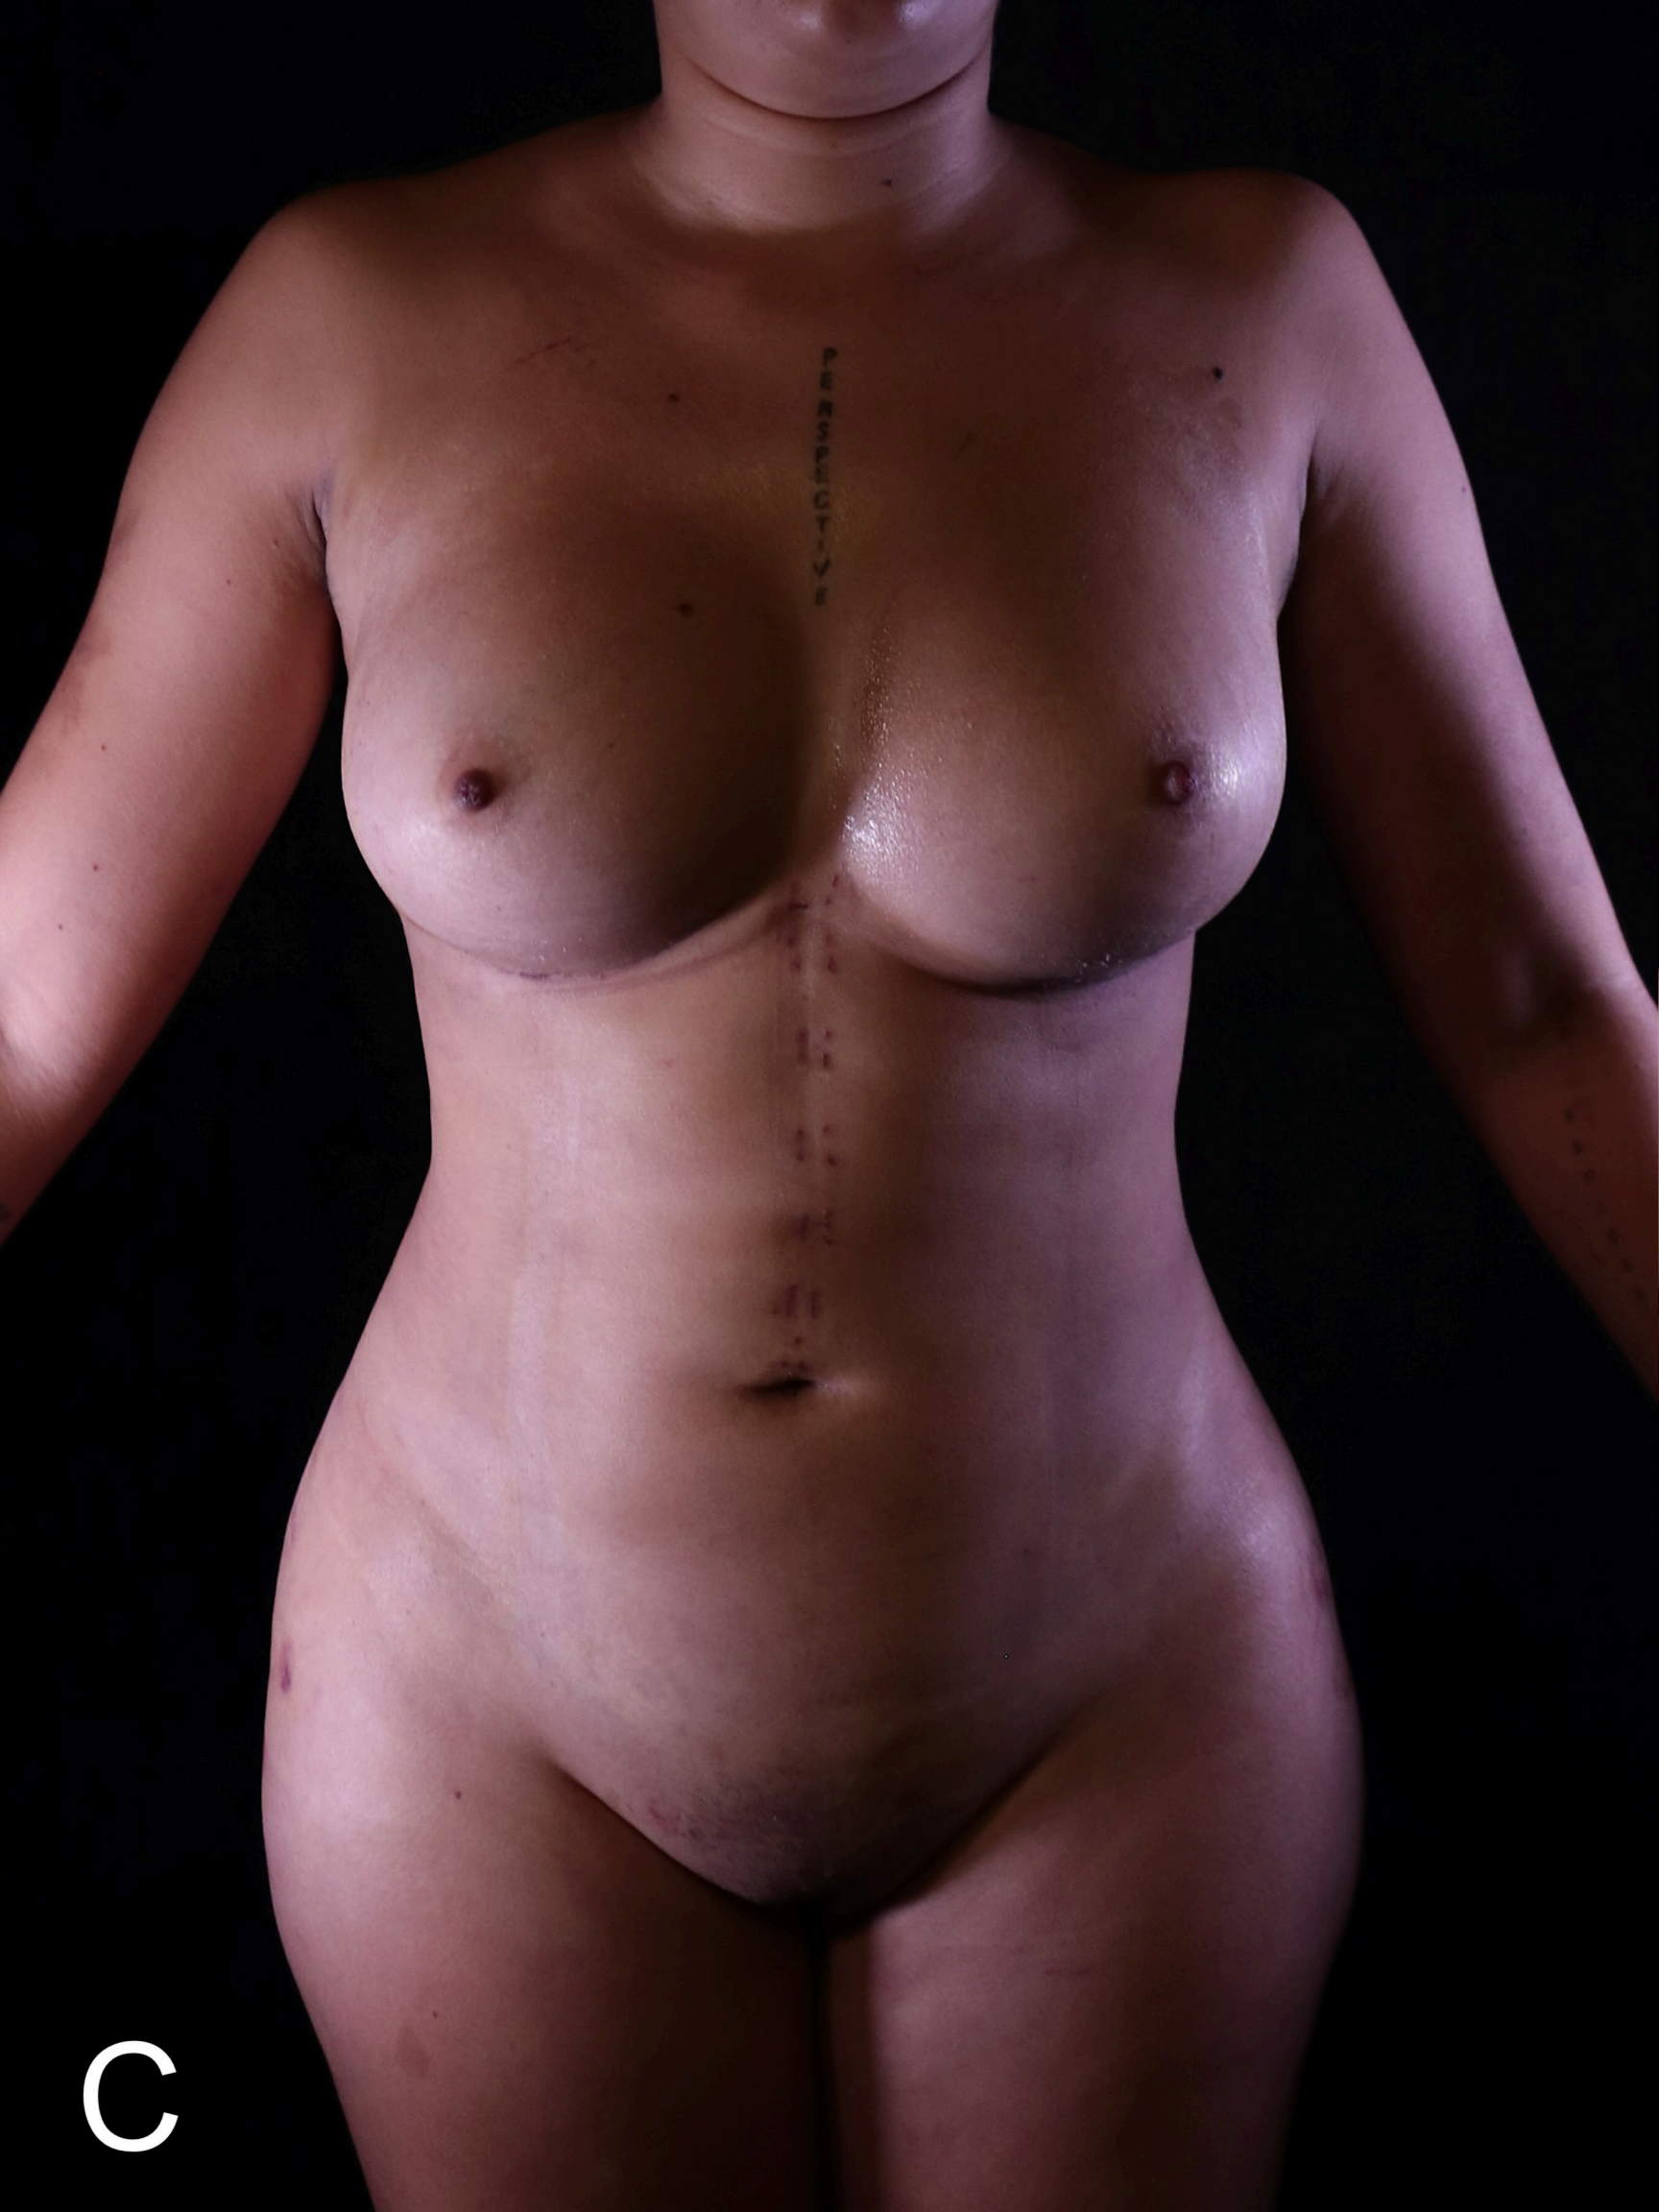

C

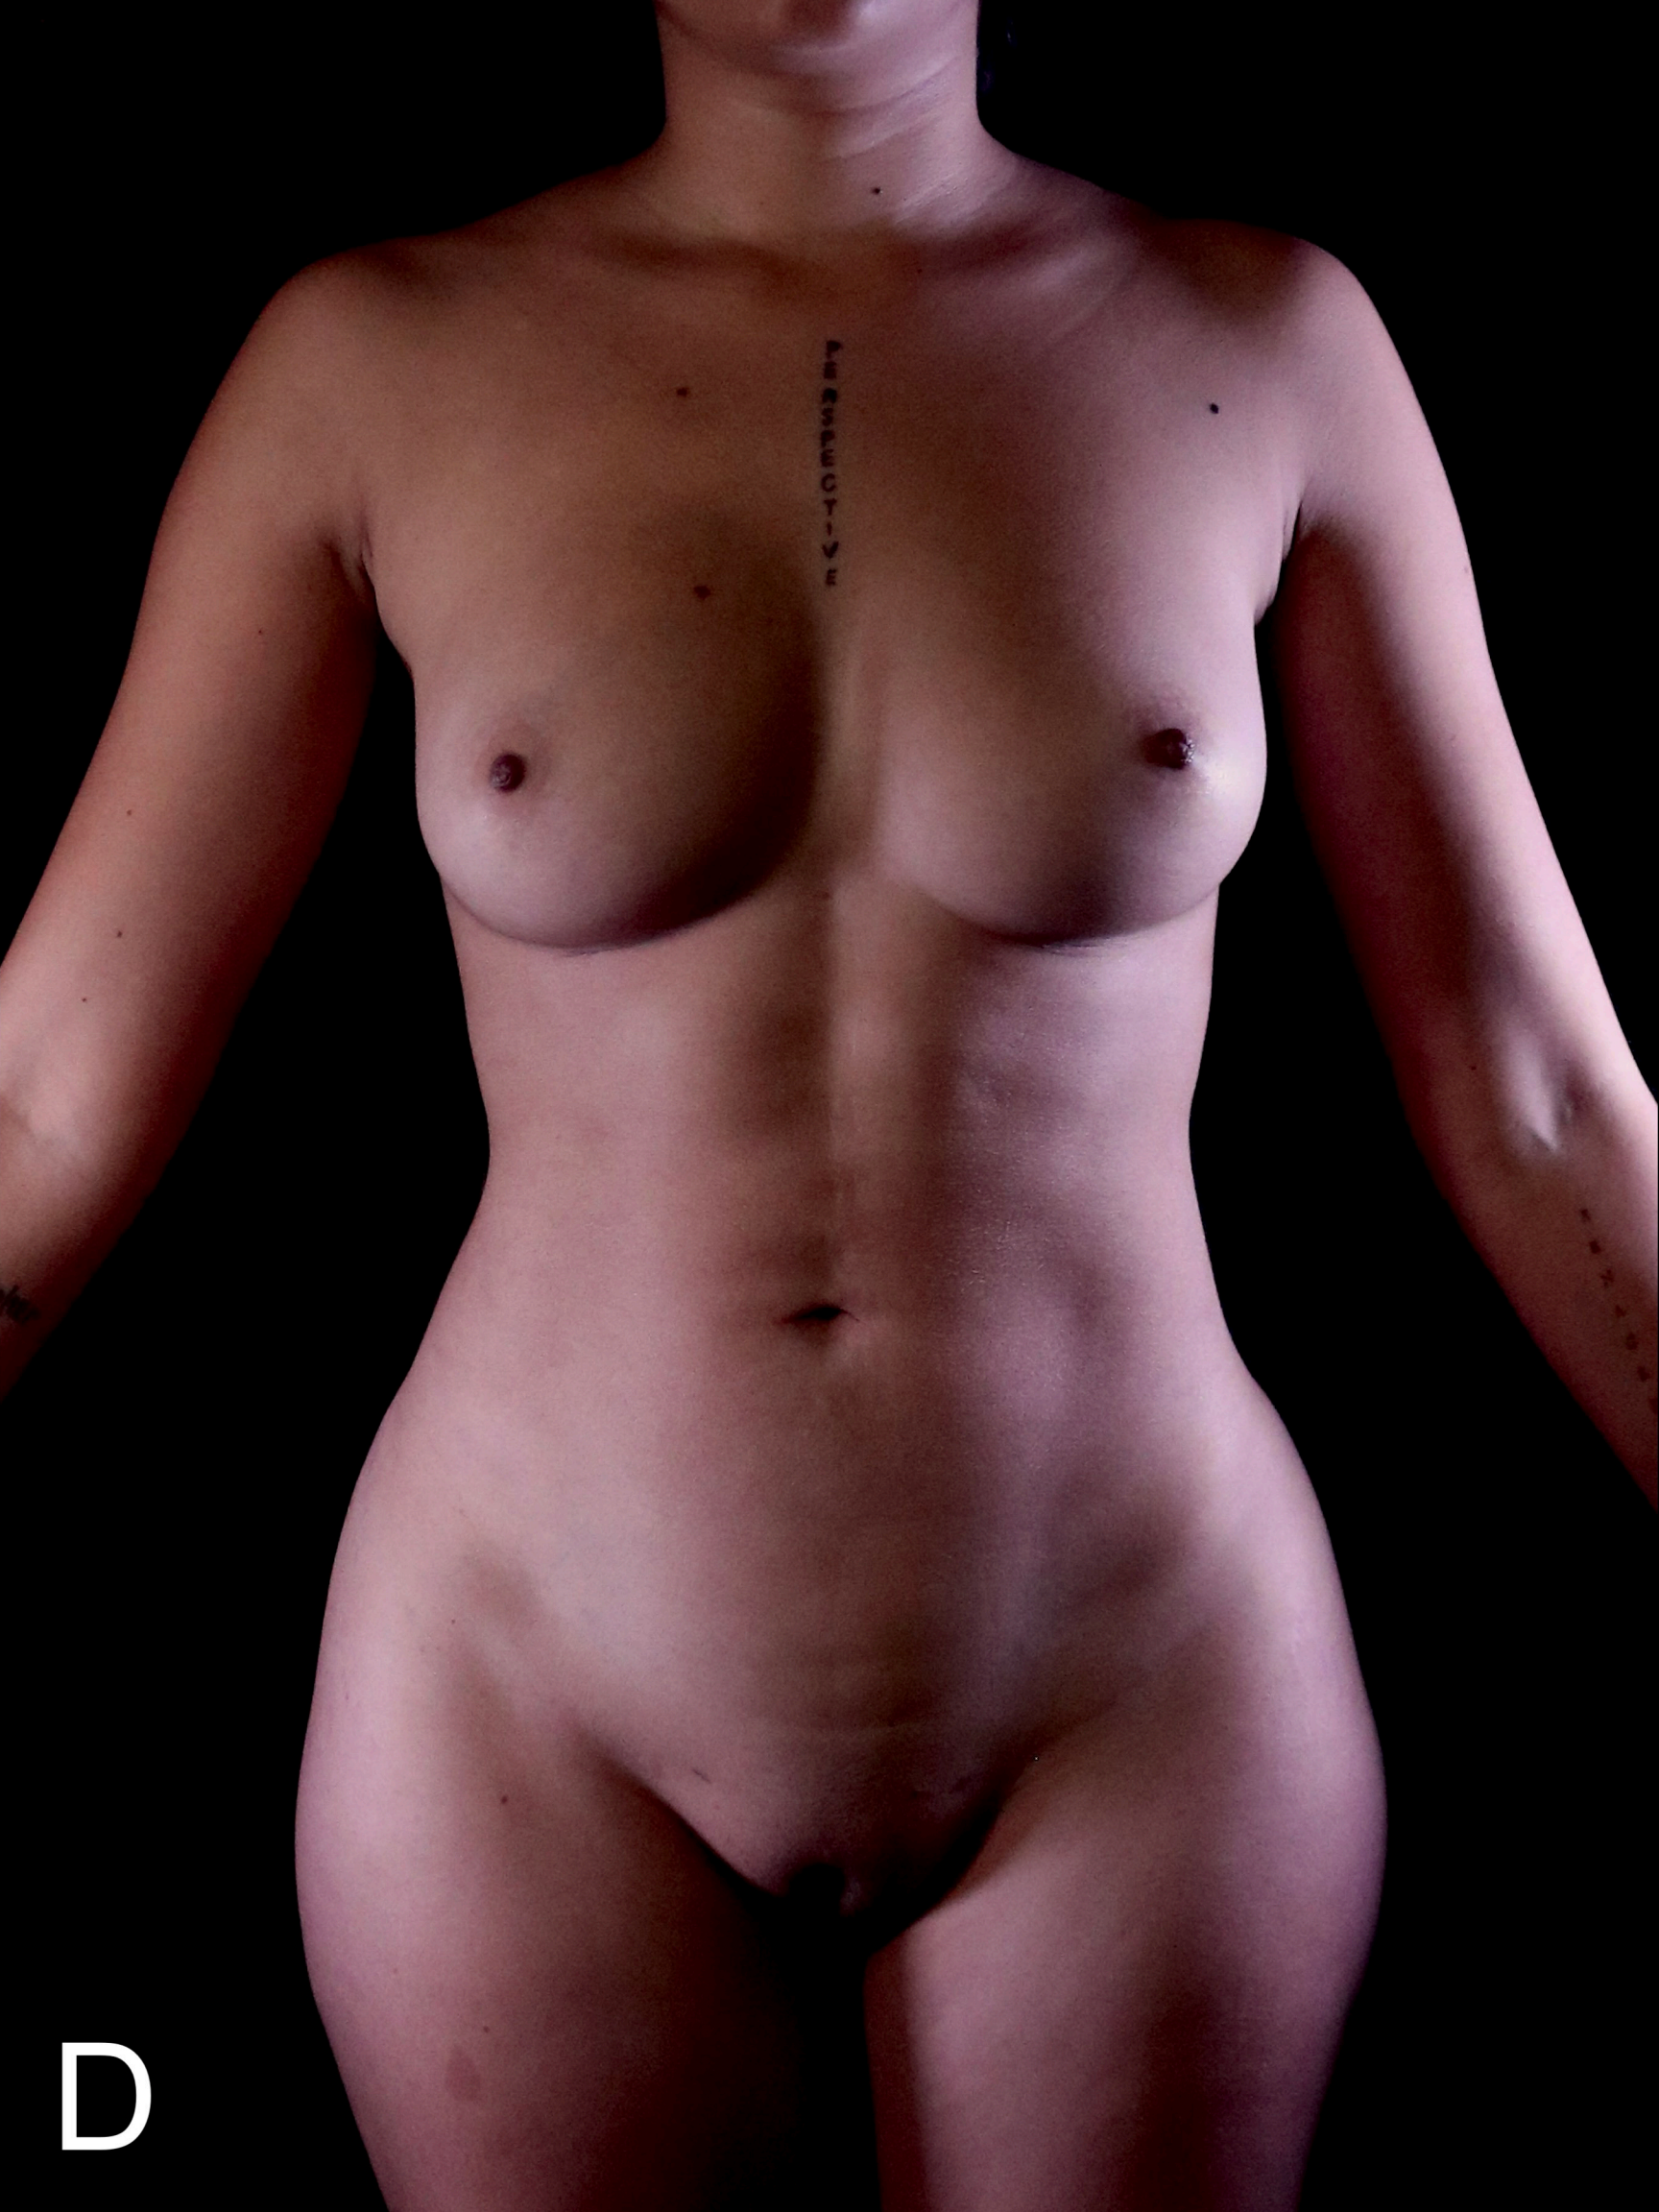

D

Supplement: gox-12-e5958-s002.pdf [file gox-12-e5958-s002.pdf]
